# Supplementary material for: High-performance organic field-effect transistors based on single-crystalline microribbons of a two-dimensional fused heteroarene semiconductor
Source: Royal Society of Chemistry journal article supplement (doi:10.1039/c5cc03305e), 2015-01-01
Supplement: c5cc03305e1.xlsx [file c5cc03305e1.xlsx]

## Sheet: Sheet2
Number of device	dielectric	W/L	A(intercept）	B（slope）	Imax	Imin	u（mobility）	VT	on/off ratios
w-2-1	OTS/SiO2	0.15	0.000122351	-6.83793e-05	-4.9973e-06	-7.4738e-12	6.26431	1.7893	668643
w-2-2	OTS/SiO2	0.153	-6.93409e-05	-7.21187e-05	-6.22073e-06	-3.53686e-13	6.79883	-0.961483	1.75883e+07
w-2-3	OTS/SiO2	0.225	0.000215513	-7.59116e-05	-8.88384e-06	-3.16423e-13	5.12229	2.839	2.80759e+07
w-2-4	OTS/SiO2	0.06967	0.000299935	-3.9589e-05	-3.41286e-06	-8.3275e-13	4.49918	7.57622	4.0983e+06
w-2-5	OTS/SiO2	0.1412	0.000268887	-4.14204e-05	-3.41286e-06	-8.3275e-13	2.4301	6.49166	4.0983e+06
w-2-6	OTS/SiO2	0.1598	1.78226e-05	-7.01765e-05	-6.73955e-06	-3.65415e-13	6.16363	0.253968	1.84435e+07
w-2-7	OTS/SiO2	0.25267	9.66493e-05	-6.99864e-05	-7.55259e-06	-4.48549e-13	3.87707	1.38097	1.68378e+07
w-2-8	OTS/SiO2	0.14779	0.000425068	-7.94382e-05	-1.03945e-05	-5.75941e-13	8.53972	5.35093	1.80479e+07
w-2-9	OTS/SiO2	0.168	0.00034706	-4.0975e-05	-3.65886e-06	-1.7883e-12	1.99875	8.47004	2.046e+06
w-2-10	OTS/SiO2	0.1325	0.000499333	-6.69301e-05	-8.11889e-06	2.71026e-14	6.76172	7.46051	-2.99561e+08
w-2-11	OTS/SiO2	0.177	0.000551765	-7.13685e-05	-9.60153e-06	-3.011e-15	5.75533	7.73121	3.18882e+09
w-2-12	OTS/SiO2	0.177	0.000617693	-3.86961e-05	-3.97537e-06	-1.3304e-12	1.69196	15.9627	2.9881e+06
w-2-13	OTS/SiO2	0.15	0.000385736	-6.29255e-05	-6.97958e-06	-1.59456e-13	5.27949	6.13004	4.37711e+07
w-2-14	OTS/SiO2	0.2076	0.000455068	-7.11727e-05	-9.54866e-06	-6.57607e-14	4.88011	6.39386	1.45203e+08
w-2-15	OTS/SiO2	0.34826	0.000507649	-7.52987e-05	-9.74656e-06	-1.228e-12	3.25613	6.7418	7.93694e+06
w-2-16	OTS/SiO2	0.0438	0.000727998	-3.03738e-05	-2.96641e-06	-3.97562e-11	4.21264	23.968	74615.1
w-2-17	OTS/SiO2	0.203	0.00107	-8.42293e-05	-1.35117e-05	-8.83473e-13	6.98973	12.7034	1.52939e+07
w-2-18	OTS/SiO2	0.21456	0.000684939	-7.61084e-05	-1.08112e-05	-1.66577e-13	5.39941	8.99952	6.49021e+07
w-2-19	OTS/SiO2	0.06528	0.00043186	-3.23182e-05	-2.388e-06	-1.86337e-13	3.19996	13.3627	1.28155e+07
w-2-20	OTS/SiO2	0.138	0.00192	-0.000111103	-7.89358e-06	-1.21586e-13	17.8897	17.2813	6.49217e+07
w-2-21	OTS/SiO2	0.1528	0.000427938	-5.19576e-05	-4.97314e-06	-3.74401e-13	3.5335	8.23629	1.32829e+07
w-2-22	OTS/SiO2	0.151359	0.000638737	-8.28628e-05	-6.91587e-06	-9.1763e-15	9.0728	7.70837	7.53667e+08
w-2-23	OTS/SiO2	0.125695	0.00104	-6.50767e-05	-8.23126e-06	-1.91897e-11	6.7385	15.9811	428941
w-2-24	OTS/SiO2	0.07198	0.00102	-4.85472e-05	-4.64467e-06	-1.46174e-13	6.54857	21.0105	3.17748e+07
w-2-25	OTS/SiO2	0.1007	0.000369574	-5.01057e-05	-4.83517e-06	-1.41995e-13	4.98626	7.37589	3.40516e+07
w-2-26	OTS/SiO2	0.0734	0.000201384	-2.0019e-05	-1.07518e-06	-1.3124e-12	1.09199	10.0596	819248
w-2-27	OTS/SiO2	0.151426	0.000875529	-8.43437e-05	-9.41944e-06	-1.53489e-13	9.3958	10.3805	6.13688e+07
w-2-28	OTS/SiO2	0.1394	0.000609096	-5.61379e-05	-6.04485e-06	-3.74564e-14	4.52147	10.85	1.61384e+08
w-2-29	OTS/SiO2	0.21435	-7.03345e-05	-7.03345e-05	-6.57742e-06	-4.96957e-13	4.61576	-1	1.32354e+07
w-2-30	OTS/SiO2	0.0876	0.000202991	-3.39659e-05	-2.13425e-06	-2.04032e-14	2.63398	5.97632	1.04604e+08
